# Supplementary material for: CRISPR/Cas9 Mutant Rice Ospmei12 Involved in Growth, Cell Wall Development, and Response to Phytohormone and Heavy Metal Stress
Source: Int J Mol Sci. 2022 Dec 16;23(24):16082. doi: 10.3390/ijms232416082 (PMC9784561; doi:10.3390/ijms232416082)
Supplement: Supplementary file 1 [file ijms-23-16082-s001.zip › Table S1.xlsx]

## Sheet: Primer information
		Primer Information
	Gene	Forward primers（5’-3’）	Reverse primers（5’-3’）
	OsPMEI-12-cloning	AGGAGGAGAGCAAGAATGAGAAT	TATGGGTATTGGCTCTGTTG
	pC1300U-OsPMEI12	CGGACTAGTATGCTCACAGATAGAAAGAAAA	CGGGGTACCACAAATAAAAAGGGATGATATG
	020-1-sgRNA	ggcaGCGTCTGCAGTGCGTCTGGA	aaacTCCAGACGCACTGCAGACGC
	020-2-sgRNA	ggcaTAGCTCCTTTATGTCATCGG	aaacCCGATGACATAAAGGAGCTA
	020-3-sgRNA	ggcAACAATCGCGCCTACGACGT	aaacACGTCGTAGGCGCGATTGTT
	020-4-sgRNA	ggcaGCACTTCTGCGTCAGGGACA	aaacTGTCCCTGACGCAGAAGTGC
	020-5-sgRNA	ggcaCAATAATCCAGCTCTGGTTG	aaacCAACCAGAGCTGGATTATTG
	020-1-Test	GCGATTGAAAGCCAAAA	TGCGGAGGAAGCAAAA
	020-2-3-4-Test	AGGAGGAGAGCAAGAATGAGAAT	TATGGGTATTGGCTCTGTTG
	020-5-Test	TGTCCCTGACGCAGAAGT	TTTCAATCGCTTGTGGAGT
	hSpCas9-F	ATCCGTTGTTGTGTCCT	CTTCTTGATGCTGTGCC
	Hyg-F	AGTTTGCGCGCTATATTTTGT	CTTGTATGGAGCAGACG
	pD1301s-eGFP-OsPMEI12	cggGGTACCGAAAGAAAAAGGAGGAGAGCAAGA	cgcGGATCCTGGGTATTGGCTCTGTTGG
